# Supplementary material for: Two-photon absorption of fluorescent protein chromophores incorporating non-canonical amino acids: TD-DFT screening and classical dynamics
Source: Royal Society of Chemistry journal article supplement (doi:10.1039/c5cp03875h), 2015-01-01
Supplement: c5cp03875h1.pdf [file c5cp03875h1.pdf]

## Supplementary Information for “Two-photon absorption of fluorescent protein chromophores incorporating non-canonical amino acids: TDDFT screening and classical dynamics”

M. Alaraby Salem<sup>a</sup> and Alex Brown<sup>a\*</sup>

**Table S1** Coordinates of the optimized models at the PBE0/6-31+G(d,p) level of theory in the gas phase.

| Coordinates for Model Number 1a |           |           |           |
|---------------------------------|-----------|-----------|-----------|
| C                               | -2.004341 | 2.044783  | 0.000026  |
| C                               | -0.745110 | 1.457117  | 0.000033  |
| C                               | -0.612638 | 0.054944  | 0.000013  |
| C                               | 0.669150  | -0.626807 | 0.000019  |
| C                               | -1.774466 | -0.731069 | -0.000014 |
| C                               | -3.037302 | -0.133378 | -0.000020 |
| C                               | -3.155698 | 1.262783  | 0.000000  |
| C                               | 3.131168  | -0.975476 | 0.000050  |
| C                               | 3.598382  | 1.220328  | 0.000106  |
| C                               | 1.917459  | -0.105674 | 0.000048  |
| C                               | -4.212836 | -0.951833 | -0.000046 |
| N                               | 4.161024  | -0.033060 | 0.000089  |
| N                               | 2.304977  | 1.238482  | 0.000083  |
| N                               | -5.167801 | -1.613413 | -0.000067 |
| H                               | 0.151245  | 2.067632  | 0.000054  |
| H                               | -1.697179 | -1.814411 | -0.000029 |
| H                               | 0.639826  | -1.715793 | -0.000004 |
| H                               | 4.217340  | 2.110997  | 0.000135  |
| H                               | 5.142484  | -0.261640 | 0.000099  |
| H                               | -4.140390 | 1.718765  | -0.000006 |
| H                               | -2.091697 | 3.126949  | 0.000041  |
| O                               | 3.254725  | -2.183013 | 0.000025  |
| Coordinates for Model Number 1b |           |           |           |
| C                               | -2.669828 | 0.350148  | -0.000023 |
| C                               | -1.274237 | 0.319087  | -0.000006 |
| C                               | -0.602774 | -0.915019 | -0.000028 |
| C                               | 0.844609  | -1.027956 | -0.000011 |
| C                               | -1.364114 | -2.097405 | -0.000066 |
| C                               | -2.753961 | -2.059019 | -0.000082 |
| C                               | -3.417113 | -0.837907 | -0.000060 |
| C                               | 3.241065  | -0.355063 | 0.000048  |
| C                               | 2.779450  | 1.842203  | 0.000110  |
| C                               | 1.779265  | -0.050192 | 0.000032  |
| C                               | -3.350363 | 1.611677  | 0.000000  |

---

|   |           |           |           |
|---|-----------|-----------|-----------|
| N | 3.801391  | 0.923178  | 0.000100  |
| N | 1.589696  | 1.335019  | 0.000072  |
| N | -3.910944 | 2.629119  | 0.000019  |
| H | -0.702029 | 1.240155  | 0.000024  |
| H | -0.851822 | -3.056129 | -0.000084 |
| H | -3.323106 | -2.983389 | -0.000112 |
| H | 1.251251  | -2.038599 | -0.000035 |
| H | 2.984492  | 2.907228  | 0.000148  |
| H | 4.791234  | 1.112035  | 0.000124  |
| H | -4.501319 | -0.792525 | -0.000073 |
| O | 3.841875  | -1.410056 | 0.000023  |

---

Coordinates for Model Number 2a

|   |           |           |           |
|---|-----------|-----------|-----------|
| C | -2.382542 | 0.051571  | 0.000094  |
| C | -0.991872 | -0.031375 | 0.000047  |
| C | -0.205649 | 1.135977  | 0.000012  |
| C | 1.244558  | 1.118170  | -0.000038 |
| C | -0.854918 | 2.382560  | 0.000024  |
| C | -2.243750 | 2.467023  | 0.000070  |
| C | -3.007798 | 1.307005  | 0.000105  |
| C | 3.574994  | 0.250403  | -0.000119 |
| C | 2.939021  | -1.903626 | -0.000098 |
| C | 2.096025  | 0.065595  | -0.000067 |
| C | -3.249785 | -1.170363 | 0.000133  |
| C | -2.594480 | -2.528806 | 0.000123  |
| N | 4.030969  | -1.069393 | -0.000135 |
| N | 1.794334  | -1.301497 | -0.000057 |
| H | -0.487289 | -0.990847 | 0.000038  |
| H | -0.256619 | 3.290393  | -0.000004 |
| H | 1.738040  | 2.089581  | -0.000056 |
| H | 3.058997  | -2.981567 | -0.000102 |
| H | 5.002631  | -1.336190 | -0.000169 |
| H | -4.093013 | 1.340395  | 0.000141  |
| H | -1.956509 | -2.655953 | -0.881072 |
| H | -1.956458 | -2.655943 | 0.881284  |
| H | -3.373475 | -3.291652 | 0.000150  |
| H | -2.727314 | 3.439333  | 0.000079  |
| O | 4.262559  | 1.252160  | -0.000142 |
| O | -4.463720 | -1.060596 | 0.000173  |

---

Coordinates for Model Number 2b

|   |           |           |           |
|---|-----------|-----------|-----------|
| C | -1.594319 | 2.245517  | 0.054927  |
| C | -0.359102 | 1.612099  | 0.039753  |
| C | -0.285121 | 0.204213  | -0.001070 |
| C | 0.965875  | -0.531420 | -0.019660 |
| C | -1.479094 | -0.528822 | -0.025012 |

---

|   |           |           |           |
|---|-----------|-----------|-----------|
| C | -2.722921 | 0.104843  | -0.009683 |
| C | -2.774339 | 1.502254  | 0.030404  |
| C | 3.409547  | -0.993011 | -0.027753 |
| C | 3.977557  | 1.178966  | 0.036158  |
| C | 2.238125  | -0.070178 | -0.003598 |
| C | -3.951646 | -0.750123 | -0.037273 |
| C | -5.305287 | -0.082975 | -0.021817 |
| N | 4.481824  | -0.099020 | 0.000090  |
| N | 2.686701  | 1.255346  | 0.035688  |
| H | -1.640487 | 3.330194  | 0.086460  |
| H | 0.560244  | 2.187434  | 0.059063  |
| H | -1.462264 | -1.615130 | -0.056561 |
| H | 0.883940  | -1.617325 | -0.051350 |
| H | 4.637148  | 2.039566  | 0.062573  |
| H | 5.451205  | -0.373810 | -0.005080 |
| H | -3.730499 | 2.016361  | 0.042573  |
| H | -5.428482 | 0.573113  | -0.890401 |
| H | -5.429176 | 0.533021  | 0.875550  |
| H | -6.074486 | -0.855371 | -0.039214 |
| O | 3.481814  | -2.205101 | -0.062224 |
| O | -3.855508 | -1.964365 | -0.071999 |

---

Coordinates for Model Number 3

|   |           |           |           |
|---|-----------|-----------|-----------|
| C | -1.170720 | -0.877053 | -0.543579 |
| C | 0.192925  | -0.693181 | -0.363255 |
| C | 0.726344  | 0.601754  | -0.212399 |
| C | 2.140312  | 0.868165  | -0.032125 |
| C | -0.152117 | 1.699465  | -0.246914 |
| C | -1.517360 | 1.523531  | -0.425218 |
| C | -2.009616 | 0.232593  | -0.565547 |
| C | 4.583936  | 0.477726  | 0.209600  |
| C | 4.402642  | -1.752992 | 0.026354  |
| C | 3.181939  | 0.005645  | 0.020789  |
| C | -4.173226 | -0.259826 | 0.209465  |
| N | 5.296048  | -0.722760 | 0.199603  |
| N | 3.166337  | -1.389509 | -0.083228 |
| H | -1.589262 | -1.869638 | -0.669973 |
| H | 0.863485  | -1.545192 | -0.344050 |
| H | 0.246531  | 2.704298  | -0.135756 |
| H | -2.198923 | 2.366686  | -0.459185 |
| H | 2.423487  | 1.914751  | 0.075740  |
| H | 4.738767  | -2.783490 | -0.011809 |
| H | 6.295743  | -0.792788 | 0.304566  |
| O | 5.047936  | 1.592659  | 0.342640  |
| O | -3.371880 | 0.065860  | -0.823905 |

---

|                                |           |           |           |
|--------------------------------|-----------|-----------|-----------|
| F                              | -4.155392 | 0.659125  | 1.188817  |
| F                              | -3.844059 | -1.434137 | 0.774276  |
| F                              | -5.414531 | -0.353563 | -0.255981 |
| <hr/>                          |           |           |           |
| Coordinates for Model Number 4 |           |           |           |
| C                              | -1.850017 | -1.008352 | 0.000038  |
| C                              | -0.479634 | -0.791376 | 0.000015  |
| C                              | 0.028156  | 0.522247  | 0.000046  |
| C                              | 1.442511  | 0.840590  | 0.000050  |
| C                              | -0.884880 | 1.592234  | 0.000091  |
| C                              | -2.252389 | 1.358400  | 0.000103  |
| C                              | -2.769692 | 0.054788  | 0.000078  |
| C                              | 3.911215  | 0.549125  | 0.000049  |
| C                              | 3.803954  | -1.693714 | -0.000038 |
| C                              | 2.517764  | 0.017483  | 0.000019  |
| N                              | 4.667839  | -0.623538 | 0.000010  |
| N                              | 2.549414  | -1.381283 | -0.000035 |
| H                              | -2.231277 | -2.025721 | 0.000028  |
| H                              | 0.215182  | -1.624074 | -0.000018 |
| H                              | -0.507502 | 2.611969  | 0.000126  |
| H                              | -2.916859 | 2.221520  | 0.000166  |
| H                              | 1.694943  | 1.900592  | 0.000091  |
| H                              | 4.176353  | -2.712412 | -0.000075 |
| H                              | 5.674938  | -0.652087 | 0.000017  |
| H                              | -4.954527 | 1.622812  | -0.000635 |
| H                              | -5.676045 | -1.623235 | 0.000495  |
| O                              | 4.339427  | 1.686556  | 0.000098  |
| O                              | -5.283516 | 0.721102  | -0.000253 |
| O                              | -4.716291 | -1.546364 | 0.000542  |
| B                              | -4.309587 | -0.244123 | 0.000113  |
| <hr/>                          |           |           |           |
| Coordinates for Model Number 5 |           |           |           |
| C                              | 2.556015  | -1.211939 | 0.000033  |
| C                              | 1.202508  | -0.906217 | 0.000054  |
| C                              | 0.768063  | 0.434352  | 0.000020  |
| C                              | -0.628394 | 0.817470  | 0.000040  |
| C                              | 1.738081  | 1.454029  | -0.000036 |
| C                              | 3.095123  | 1.160997  | -0.000058 |
| C                              | 3.477513  | -0.172399 | -0.000023 |
| C                              | -3.107585 | 0.628305  | 0.000104  |
| C                              | -3.092582 | -1.618008 | 0.000170  |
| C                              | -1.738785 | 0.041502  | 0.000089  |
| N                              | -3.911293 | -0.513559 | 0.000157  |
| N                              | -1.826531 | -1.355684 | 0.000133  |
| H                              | 2.905915  | -2.238886 | 0.000059  |
| H                              | 0.461720  | -1.698224 | 0.000097  |

---

|                                |           |           |           |
|--------------------------------|-----------|-----------|-----------|
| H                              | 1.417985  | 2.492692  | -0.000063 |
| H                              | 3.849427  | 1.940536  | -0.000102 |
| H                              | -0.835365 | 1.887312  | 0.000013  |
| H                              | -3.505466 | -2.620920 | 0.000210  |
| H                              | -4.918709 | -0.500774 | 0.000182  |
| O                              | -3.491584 | 1.781849  | 0.000079  |
| F                              | 4.789792  | -0.466502 | -0.000044 |
| <hr/>                          |           |           |           |
| Coordinates for Model Number 6 |           |           |           |
| C                              | -0.816519 | -0.519193 | 0.000507  |
| C                              | 0.569334  | -0.491706 | 0.000271  |
| C                              | 1.255863  | 0.738138  | -0.000270 |
| C                              | 2.701324  | 0.844889  | -0.000530 |
| C                              | 0.503282  | 1.927974  | -0.000570 |
| C                              | -0.881620 | 1.896984  | -0.000321 |
| C                              | -1.555902 | 0.670675  | 0.000218  |
| C                              | 5.098300  | 0.180362  | -0.000561 |
| C                              | 4.649835  | -2.019309 | 0.000545  |
| C                              | 3.638924  | -0.132255 | -0.000215 |
| C                              | -3.045721 | 0.708497  | 0.000485  |
| C                              | -5.594086 | -0.282195 | 0.001151  |
| C                              | -6.548255 | -1.464394 | -0.000164 |
| N                              | 5.666664  | -1.094665 | -0.000031 |
| N                              | 3.457183  | -1.518842 | 0.000462  |
| H                              | -1.323793 | -1.479728 | 0.000942  |
| H                              | 1.139579  | -1.413752 | 0.000512  |
| H                              | 1.020640  | 2.884087  | -0.000996 |
| H                              | -1.465417 | 2.811904  | -0.000537 |
| H                              | 3.110910  | 1.854595  | -0.001038 |
| H                              | 4.861493  | -3.083072 | 0.001029  |
| H                              | 6.657624  | -1.276965 | -0.000067 |
| H                              | -5.730808 | 0.349374  | 0.882785  |
| H                              | -5.730471 | 0.351217  | -0.879225 |
| H                              | -6.415172 | -2.091824 | -0.886850 |
| H                              | -6.415326 | -2.093634 | 0.885281  |
| H                              | -7.579906 | -1.098662 | 0.000103  |
| O                              | 5.695224  | 1.238162  | -0.001140 |
| O                              | -3.671033 | 1.750982  | 0.000468  |
| S                              | -3.873311 | -0.870320 | 0.000792  |
| <hr/>                          |           |           |           |
| Coordinates for Model Number 7 |           |           |           |
| C                              | -0.486788 | -0.513583 | -0.013210 |
| C                              | 0.899096  | -0.486516 | -0.002924 |
| C                              | 1.586985  | 0.739154  | -0.092247 |
| C                              | 3.032514  | 0.845173  | -0.083714 |
| C                              | 0.835617  | 1.925637  | -0.192120 |

---

|   |           |           |           |
|---|-----------|-----------|-----------|
| C | -0.549233 | 1.895534  | -0.199073 |
| C | -1.225033 | 0.673049  | -0.111435 |
| C | 5.428300  | 0.183812  | 0.013845  |
| C | 4.977193  | -2.005936 | 0.217929  |
| C | 3.968705  | -0.127761 | 0.021174  |
| C | -2.715401 | 0.712486  | -0.119274 |
| C | -5.282238 | -0.327287 | -0.109726 |
| C | -5.689103 | -0.012137 | 1.322699  |
| C | -6.142283 | -1.417677 | -0.737037 |
| N | 5.995044  | -1.085233 | 0.145115  |
| N | 3.785317  | -1.508195 | 0.150613  |
| H | -0.996334 | -1.469424 | 0.065844  |
| H | 1.468117  | -1.405747 | 0.078143  |
| H | 1.354141  | 2.878468  | -0.262806 |
| H | -1.131624 | 2.808438  | -0.271811 |
| H | 3.443284  | 1.850643  | -0.170533 |
| H | 5.187579  | -3.064701 | 0.324262  |
| H | 6.985617  | -1.266336 | 0.179683  |
| H | -5.327101 | 0.586113  | -0.711956 |
| H | -5.608137 | -0.900790 | 1.957315  |
| H | -5.068051 | 0.781280  | 1.745081  |
| H | -6.731420 | 0.327829  | 1.342212  |
| H | -5.864489 | -1.604489 | -1.778000 |
| H | -6.060467 | -2.360101 | -0.184344 |
| H | -7.192909 | -1.109378 | -0.711817 |
| O | 6.026304  | 1.237061  | -0.077860 |
| O | -3.335613 | 1.757909  | -0.086444 |
| S | -3.534490 | -0.869236 | -0.201942 |

---

Coordinates for Model Number 8

|   |           |           |           |
|---|-----------|-----------|-----------|
| C | 2.301627  | -1.104416 | 0.000052  |
| C | 0.942094  | -0.839654 | 0.000048  |
| C | 0.473653  | 0.488701  | 0.000001  |
| C | -0.934591 | 0.836107  | 0.000000  |
| C | 1.414168  | 1.535647  | -0.000045 |
| C | 2.775586  | 1.277652  | -0.000042 |
| C | 3.226883  | -0.049042 | 0.000007  |
| C | -3.408851 | 0.570648  | 0.000036  |
| C | -3.322852 | -1.672156 | 0.000105  |
| C | -2.018358 | 0.025065  | 0.000036  |
| C | 4.630370  | -0.325955 | 0.000013  |
| N | -4.176156 | -0.595440 | 0.000082  |
| N | -2.064388 | -1.372205 | 0.000081  |
| N | 5.770902  | -0.549425 | 0.000017  |
| H | 2.660057  | -2.128737 | 0.000089  |

---

|                                 |           |           |           |
|---------------------------------|-----------|-----------|-----------|
| H                               | 0.223531  | -1.651522 | 0.000083  |
| H                               | 1.064666  | 2.564599  | -0.000082 |
| H                               | 3.493119  | 2.091581  | -0.000077 |
| H                               | -1.169800 | 1.899701  | -0.000032 |
| H                               | -3.703823 | -2.687688 | 0.000141  |
| H                               | -5.183654 | -0.615993 | 0.000095  |
| O                               | -3.823146 | 1.711515  | 0.000003  |
| <hr/>                           |           |           |           |
| Coordinates for Model Number 9  |           |           |           |
| C                               | 1.726088  | -1.194310 | -0.000061 |
| C                               | 0.367394  | -0.909306 | -0.000080 |
| C                               | -0.076342 | 0.425919  | -0.000050 |
| C                               | -1.472195 | 0.808823  | -0.000052 |
| C                               | 0.894485  | 1.445168  | -0.000010 |
| C                               | 2.249080  | 1.147717  | 0.000009  |
| C                               | 2.692816  | -0.181046 | -0.000017 |
| C                               | -3.951882 | 0.628373  | -0.000239 |
| C                               | -3.945854 | -1.618255 | 0.000039  |
| C                               | -2.586067 | 0.036573  | -0.000096 |
| C                               | 4.168339  | -0.518600 | -0.000001 |
| C                               | 4.866325  | -0.003229 | 1.262754  |
| C                               | 4.866374  | -0.003140 | -1.262692 |
| N                               | -4.760354 | -0.510057 | 0.000202  |
| N                               | -2.679139 | -1.360525 | -0.000165 |
| H                               | -0.365388 | -1.708905 | -0.000115 |
| H                               | 0.571307  | 2.483677  | 0.000012  |
| H                               | -1.677165 | 1.879271  | -0.000050 |
| H                               | -4.363358 | -2.619291 | 0.000236  |
| H                               | -5.767601 | -0.492483 | 0.000829  |
| H                               | 2.970196  | 1.961288  | 0.000044  |
| H                               | 4.245474  | -1.614089 | -0.000038 |
| H                               | 4.387668  | -0.389198 | 2.168003  |
| H                               | 5.917571  | -0.311057 | 1.272445  |
| H                               | 4.840178  | 1.091101  | 1.310864  |
| H                               | 4.387752  | -0.389044 | -2.167988 |
| H                               | 4.840229  | 1.091193  | -1.310726 |
| H                               | 5.917620  | -0.310967 | -1.272365 |
| H                               | 2.050061  | -2.232865 | -0.000083 |
| O                               | -4.333682 | 1.783416  | 0.000207  |
| <hr/>                           |           |           |           |
| Coordinates for Model Number 10 |           |           |           |
| C                               | 1.458448  | -0.996653 | -0.000049 |
| C                               | 0.089605  | -0.769091 | -0.000011 |
| C                               | -0.419834 | 0.543763  | 0.000020  |
| C                               | -1.835284 | 0.853307  | 0.000044  |
| C                               | 0.492949  | 1.613746  | 0.000019  |

---

|    |           |           |           |
|----|-----------|-----------|-----------|
| C  | 1.864608  | 1.396937  | -0.000019 |
| C  | 2.336655  | 0.086949  | -0.000057 |
| C  | -4.301596 | 0.530779  | 0.000057  |
| C  | -4.164109 | -1.710879 | 0.000010  |
| C  | -2.901864 | 0.018721  | 0.000035  |
| N  | -5.041919 | -0.652876 | 0.000039  |
| N  | -2.913863 | -1.380578 | 0.000006  |
| H  | 1.845422  | -2.010178 | -0.000075 |
| H  | -0.602867 | -1.603868 | -0.000009 |
| H  | 0.116983  | 2.633801  | 0.000045  |
| H  | 2.556085  | 2.232676  | -0.000024 |
| H  | -2.096056 | 1.911092  | 0.000068  |
| H  | -4.522178 | -2.734678 | -0.000009 |
| H  | -6.048566 | -0.695350 | 0.000046  |
| O  | -4.745879 | 1.661923  | 0.000082  |
| BR | 4.202032  | -0.230176 | -0.000128 |

---

Coordinates for Model Number 11

|   |           |           |           |
|---|-----------|-----------|-----------|
| C | -1.940372 | -1.077351 | -0.001470 |
| C | -0.575118 | -0.828797 | 0.000937  |
| C | -0.096791 | 0.494895  | -0.011569 |
| C | 1.312487  | 0.835729  | -0.008171 |
| C | -1.032222 | 1.548364  | -0.027093 |
| C | -2.393053 | 1.294003  | -0.028703 |
| C | -2.865040 | -0.024026 | -0.015692 |
| C | 3.785823  | 0.572682  | 0.012676  |
| C | 3.703648  | -1.670507 | 0.043535  |
| C | 2.397327  | 0.025412  | 0.010067  |
| C | -4.344201 | -0.246155 | -0.017251 |
| C | -4.871927 | -1.659639 | -0.007970 |
| N | 4.555325  | -0.591938 | 0.034786  |
| N | 2.445155  | -1.372405 | 0.029948  |
| H | -2.285620 | -2.106798 | 0.008416  |
| H | 0.137031  | -1.646327 | 0.012748  |
| H | -0.674026 | 2.574778  | -0.037383 |
| H | -3.118591 | 2.101484  | -0.039751 |
| H | 1.549829  | 1.898949  | -0.020902 |
| H | 4.086725  | -2.685111 | 0.060671  |
| H | 5.562728  | -0.609855 | 0.042848  |
| H | -4.533923 | -2.198238 | 0.884194  |
| H | -5.961690 | -1.625636 | -0.017888 |
| H | -4.517076 | -2.217199 | -0.881660 |
| O | 4.200611  | 1.714054  | -0.000156 |
| O | -5.108454 | 0.703857  | -0.025592 |

---

Coordinates for Model Number 12



---

|   |           |           |           |
|---|-----------|-----------|-----------|
| C | 2.039037  | -0.688645 | 0.000057  |
| C | 0.659508  | -0.570497 | 0.000036  |
| C | 0.043882  | 0.697438  | 0.000007  |
| C | -1.388930 | 0.888425  | -0.000018 |
| C | 0.872259  | 1.836231  | 0.000001  |
| C | 2.251896  | 1.726630  | 0.000022  |
| C | 2.843602  | 0.459642  | 0.000050  |
| C | -3.820250 | 0.366913  | -0.000037 |
| C | -3.503484 | -1.857043 | 0.000027  |
| C | -2.385601 | -0.030504 | -0.000008 |
| N | -4.463043 | -0.872891 | -0.000011 |
| N | -2.283992 | -1.425968 | 0.000030  |
| N | 4.810566  | -0.665569 | 0.000089  |
| N | 4.250140  | 0.431443  | 0.000069  |
| N | 5.448749  | -1.604624 | 0.000109  |
| H | 2.492269  | -1.676604 | 0.000078  |
| H | 0.035581  | -1.457755 | 0.000042  |
| H | 0.416813  | 2.823188  | -0.000022 |
| H | 2.887330  | 2.606208  | 0.000016  |
| H | -1.739453 | 1.920324  | -0.000048 |
| H | -3.777967 | -2.906275 | 0.000053  |
| H | -5.463138 | -0.994883 | -0.000021 |
| O | -4.357616 | 1.457808  | -0.000074 |

---

Coordinates for Model Number 13

|   |           |           |           |
|---|-----------|-----------|-----------|
| C | 2.229640  | -0.886854 | 0.000030  |
| C | 0.853906  | -0.697061 | 0.000015  |
| C | 0.298332  | 0.595103  | -0.000093 |
| C | -1.120718 | 0.861182  | -0.000116 |
| C | 1.185158  | 1.692275  | -0.000187 |
| C | 2.554605  | 1.515373  | -0.000170 |
| C | 3.089054  | 0.219504  | -0.000061 |
| C | -3.577230 | 0.481221  | -0.000075 |
| C | -3.390676 | -1.758485 | 0.000168  |
| C | -2.170807 | 0.002209  | -0.000023 |
| C | 5.036680  | -1.140234 | 0.000014  |
| N | -4.291378 | -0.719261 | 0.000055  |
| N | -2.148895 | -1.397880 | 0.000128  |
| H | 2.623784  | -1.896892 | 0.000112  |
| H | 0.188468  | -1.553856 | 0.000089  |
| H | 0.778643  | 2.700701  | -0.000273 |
| H | 3.235774  | 2.360204  | -0.000241 |
| H | -1.410813 | 1.911741  | -0.000225 |
| H | -3.726099 | -2.789865 | 0.000279  |
| H | -5.296777 | -0.782158 | 0.000062  |

---

|                                 |           |           |           |
|---------------------------------|-----------|-----------|-----------|
| H                               | 6.113041  | -0.966055 | -0.000004 |
| H                               | 4.762006  | -1.710840 | 0.895720  |
| H                               | 4.761992  | -1.710944 | -0.895624 |
| O                               | -4.052586 | 1.601977  | -0.000199 |
| O                               | 4.437838  | 0.139479  | -0.000054 |
| <hr/>                           |           |           |           |
| Coordinates for Model Number 14 |           |           |           |
| C                               | -1.521775 | -0.707662 | 0.000010  |
| C                               | -0.138518 | -0.583302 | 0.000012  |
| C                               | 0.477601  | 0.680497  | -0.000009 |
| C                               | 1.909178  | 0.871876  | -0.000008 |
| C                               | -0.355447 | 1.818948  | -0.000035 |
| C                               | -1.732224 | 1.707453  | -0.000037 |
| C                               | -2.326045 | 0.438646  | -0.000015 |
| C                               | 4.341181  | 0.355341  | 0.000019  |
| C                               | 4.029534  | -1.870235 | 0.000076  |
| C                               | 2.909420  | -0.044311 | 0.000020  |
| C                               | -4.330115 | -0.833708 | -0.000010 |
| C                               | -5.770133 | -0.626608 | -0.000023 |
| C                               | -6.970187 | -0.495048 | -0.000035 |
| N                               | 4.986852  | -0.883442 | 0.000057  |
| N                               | 2.809754  | -1.440849 | 0.000056  |
| H                               | -1.958326 | -1.700114 | 0.000027  |
| H                               | 0.484831  | -1.471060 | 0.000031  |
| H                               | 0.097826  | 2.807164  | -0.000052 |
| H                               | -2.373617 | 2.582715  | -0.000056 |
| H                               | 2.258579  | 1.904367  | -0.000031 |
| H                               | 4.306385  | -2.918851 | 0.000106  |
| H                               | 5.987187  | -1.002545 | 0.000066  |
| H                               | -4.039338 | -1.411215 | -0.889314 |
| H                               | -4.039352 | -1.411197 | 0.889311  |
| H                               | -8.030007 | -0.368386 | -0.000045 |
| O                               | 4.879061  | 1.447056  | -0.000007 |
| O                               | -3.681037 | 0.427592  | -0.000018 |
| <hr/>                           |           |           |           |
| Coordinates for Model Number 15 |           |           |           |
| C                               | -0.922225 | -0.611953 | 0.011280  |
| C                               | 0.463593  | -0.555251 | 0.015213  |
| C                               | 1.122723  | 0.685386  | -0.074400 |
| C                               | 2.566085  | 0.822384  | -0.077096 |
| C                               | 0.343797  | 1.855362  | -0.168622 |
| C                               | -1.039090 | 1.793407  | -0.171533 |
| C                               | -1.691036 | 0.557020  | -0.080234 |
| C                               | 4.975621  | 0.207406  | -0.014948 |
| C                               | 4.569932  | -1.993021 | 0.162609  |
| C                               | 3.521720  | -0.133128 | 0.006030  |

---

|   |           |           |           |
|---|-----------|-----------|-----------|
| C | -3.183831 | 0.552097  | -0.077159 |
| C | -3.893584 | -0.789975 | 0.014194  |
| C | -5.411525 | -0.697537 | -0.042171 |
| C | -6.111223 | -0.012419 | 1.097921  |
| N | 5.568416  | -1.052141 | 0.090305  |
| N | 3.367328  | -1.518143 | 0.118333  |
| H | -1.402612 | -1.583253 | 0.078319  |
| H | 1.053745  | -1.462032 | 0.086155  |
| H | 0.840864  | 2.819507  | -0.239854 |
| H | -1.642691 | 2.692624  | -0.244209 |
| H | 2.955829  | 1.836675  | -0.157428 |
| H | 4.802148  | -3.048897 | 0.249940  |
| H | 6.562714  | -1.214665 | 0.108050  |
| H | -3.591294 | -1.278671 | 0.950976  |
| H | -3.565054 | -1.431086 | -0.810832 |
| H | -5.877918 | 1.056740  | 1.056521  |
| H | -7.188359 | -0.162040 | 1.014278  |
| H | -5.751639 | -0.387905 | 2.062233  |
| O | 5.550875  | 1.273221  | -0.098770 |
| O | -3.808106 | 1.596200  | -0.150621 |
| O | -6.012226 | -1.186878 | -0.976301 |

---

Coordinates for Model Number 16a

|   |           |           |           |
|---|-----------|-----------|-----------|
| C | -2.128383 | -1.539240 | 0.000096  |
| C | -0.797600 | -1.143725 | 0.000072  |
| C | -0.469768 | 0.224954  | 0.000070  |
| C | 0.889643  | 0.718414  | 0.000042  |
| C | -1.510733 | 1.173594  | 0.000092  |
| C | -2.837303 | 0.779506  | 0.000116  |
| C | -3.145056 | -0.588895 | 0.000118  |
| C | 3.374446  | 0.740466  | -0.000007 |
| C | 3.553082  | -1.499461 | -0.000004 |
| C | 2.062996  | 0.039194  | 0.000019  |
| N | 4.273582  | -0.328358 | -0.000020 |
| N | 2.269191  | -1.345585 | 0.000019  |
| H | -2.382070 | -2.597483 | 0.000098  |
| H | -0.003201 | -1.881018 | 0.000056  |
| H | -1.288952 | 2.236955  | 0.000090  |
| H | 1.008625  | 1.801666  | 0.000039  |
| H | 4.051431  | -2.462738 | -0.000011 |
| H | 5.275889  | -0.227149 | -0.000041 |
| H | -4.615610 | -1.833772 | 0.000133  |
| H | -4.675170 | 1.251658  | 0.000150  |
| O | 3.662284  | 1.922757  | -0.000017 |
| O | -4.477165 | -0.881285 | 0.000141  |

---

|                                  |           |           |           |
|----------------------------------|-----------|-----------|-----------|
| O                                | -3.824001 | 1.708450  | 0.000136  |
| <hr/>                            |           |           |           |
| Coordinates for Model Number 16b |           |           |           |
| C                                | 2.388879  | 0.829189  | 0.000137  |
| C                                | 1.018223  | 0.642222  | 0.000096  |
| C                                | 0.478574  | -0.659677 | 0.000030  |
| C                                | -0.942016 | -0.930477 | -0.000008 |
| C                                | 1.354086  | -1.759280 | 0.000005  |
| C                                | 2.730774  | -1.572898 | 0.000045  |
| C                                | 3.248191  | -0.283456 | 0.000112  |
| C                                | -3.399603 | -0.556890 | -0.000029 |
| C                                | -3.216621 | 1.682743  | 0.000085  |
| C                                | -1.992593 | -0.074061 | 0.000015  |
| N                                | -4.115863 | 0.641276  | 0.000021  |
| N                                | -1.974380 | 1.325453  | 0.000085  |
| H                                | 0.361734  | 1.505389  | 0.000117  |
| H                                | 0.948948  | -2.766994 | -0.000047 |
| H                                | -1.227538 | -1.981954 | -0.000063 |
| H                                | -3.554097 | 2.713451  | 0.000131  |
| H                                | -5.121368 | 0.702650  | 0.000010  |
| H                                | 5.108200  | -0.788084 | 0.000142  |
| H                                | 3.403120  | -2.428043 | 0.000025  |
| H                                | 3.865607  | 2.021401  | 0.000220  |
| O                                | -3.870359 | -1.679219 | -0.000093 |
| O                                | 4.578685  | 0.015551  | 0.000156  |
| O                                | 2.901647  | 2.083116  | 0.000200  |
| <hr/>                            |           |           |           |
| Coordinates for Model Number 17  |           |           |           |
| C                                | -1.443721 | -0.621977 | -0.109757 |
| C                                | -0.058642 | -0.531950 | -0.072378 |
| C                                | 0.588225  | 0.714875  | -0.003500 |
| C                                | 2.022775  | 0.868677  | 0.043203  |
| C                                | -0.217224 | 1.872954  | 0.025397  |
| C                                | -1.595720 | 1.795360  | -0.013291 |
| C                                | -2.221720 | 0.543108  | -0.081547 |
| C                                | 4.440733  | 0.291362  | 0.080727  |
| C                                | 4.077017  | -1.922546 | -0.049727 |
| C                                | 3.001093  | -0.071415 | 0.021093  |
| C                                | -4.271925 | -0.673375 | -0.185982 |
| C                                | -5.732062 | -0.372439 | -0.258394 |
| C                                | -6.644124 | -0.934021 | 0.533012  |
| N                                | 5.057016  | -0.961344 | 0.029337  |
| N                                | 2.868370  | -1.463095 | -0.057566 |
| H                                | -1.906181 | -1.601325 | -0.157873 |
| H                                | 0.543581  | -1.433924 | -0.094545 |
| H                                | 0.259299  | 2.848780  | 0.079320  |

---

|                                 |           |           |           |
|---------------------------------|-----------|-----------|-----------|
| H                               | -2.215366 | 2.686007  | 0.009864  |
| H                               | 2.396964  | 1.890471  | 0.106978  |
| H                               | 4.328715  | -2.976210 | -0.100495 |
| H                               | 6.053867  | -1.105171 | 0.048764  |
| H                               | -6.030690 | 0.332951  | -1.032452 |
| H                               | -3.951268 | -1.217349 | -1.087705 |
| H                               | -4.043508 | -1.293207 | 0.691291  |
| H                               | -7.702067 | -0.717168 | 0.420764  |
| H                               | -6.365122 | -1.631928 | 1.319455  |
| O                               | 5.004391  | 1.367735  | 0.155316  |
| O                               | -3.572877 | 0.563101  | -0.111857 |
| <hr/>                           |           |           |           |
| Coordinates for Model Number 18 |           |           |           |
| C                               | 2.542622  | -1.189107 | -0.003976 |
| C                               | 1.193177  | -0.892866 | -0.003170 |
| C                               | 0.742111  | 0.444221  | -0.001559 |
| C                               | -0.648408 | 0.818073  | -0.000208 |
| C                               | 1.718325  | 1.460083  | -0.001021 |
| C                               | 3.070757  | 1.170319  | -0.001334 |
| C                               | 3.508816  | -0.164987 | -0.002366 |
| C                               | -3.127153 | 0.621202  | 0.000452  |
| C                               | -3.109335 | -1.626909 | 0.001688  |
| C                               | -1.762430 | 0.039832  | 0.000963  |
| N                               | -3.929463 | -0.522939 | 0.000797  |
| N                               | -1.844556 | -1.358402 | 0.001964  |
| N                               | 4.850791  | -0.465106 | -0.049828 |
| H                               | 2.866453  | -2.227267 | -0.010277 |
| H                               | 0.458732  | -1.691176 | -0.002768 |
| H                               | 1.399245  | 2.499665  | 0.000659  |
| H                               | 3.800681  | 1.976113  | -0.005803 |
| H                               | 5.132379  | -1.396645 | 0.210128  |
| H                               | -0.859826 | 1.887434  | -0.000868 |
| H                               | -3.519538 | -2.630856 | 0.002193  |
| H                               | -4.936626 | -0.510310 | 0.000000  |
| H                               | 5.502754  | 0.256075  | 0.213851  |
| O                               | -3.519861 | 1.774741  | -0.000130 |
| <hr/>                           |           |           |           |
| Coordinates for Model Number 19 |           |           |           |
| C                               | 1.390565  | 0.702759  | 0.000410  |
| C                               | 3.872932  | 0.809039  | 0.000396  |
| C                               | 4.128517  | -1.422606 | -0.000246 |
| C                               | 2.584466  | 0.061422  | 0.000168  |
| C                               | 0.047037  | 0.165103  | 0.000241  |
| C                               | -1.013231 | 1.061962  | -0.000079 |
| C                               | -0.235989 | -1.235055 | 0.000372  |
| C                               | -2.356852 | 0.627531  | -0.000251 |

---

|   |           |           |           |
|---|-----------|-----------|-----------|
| C | -1.531056 | -1.679341 | 0.000192  |
| C | -2.627125 | -0.774851 | -0.000117 |
| C | -3.443914 | 1.539430  | -0.000563 |
| C | -3.973020 | -1.212087 | -0.000305 |
| C | -4.740760 | 1.084189  | -0.000736 |
| C | -5.007343 | -0.304135 | -0.000605 |
| N | 4.808340  | -0.226829 | 0.000320  |
| N | 2.840276  | -1.314850 | -0.000369 |
| H | 1.473239  | 1.789378  | 0.000834  |
| H | 4.660003  | -2.368016 | -0.000471 |
| H | 5.806726  | -0.091930 | 0.000523  |
| H | -0.810521 | 2.131107  | -0.000190 |
| H | 0.594073  | -1.932505 | 0.000619  |
| H | -1.737555 | -2.746928 | 0.000287  |
| H | -3.233802 | 2.606191  | -0.000665 |
| H | -4.177996 | -2.279805 | -0.000206 |
| H | -5.566149 | 1.790183  | -0.000976 |
| H | -6.036133 | -0.652928 | -0.000744 |
| O | 4.115306  | 2.000856  | 0.001007  |

---

Coordinates for Model Number 20

|   |           |           |           |
|---|-----------|-----------|-----------|
| C | -0.951254 | 0.385524  | -0.058413 |
| C | -3.391493 | 0.885348  | -0.073680 |
| C | -3.990238 | -1.274647 | 0.112890  |
| C | -2.242940 | -0.041810 | -0.007198 |
| C | 0.240059  | -0.401838 | -0.006253 |
| C | 1.622720  | 0.044696  | 0.004058  |
| C | 0.286806  | -1.790970 | -0.015331 |
| C | 2.430160  | -1.113357 | -0.022591 |
| C | 2.258236  | 1.305588  | 0.052117  |
| C | 3.825202  | -1.093195 | -0.053788 |
| C | 3.654539  | 1.331971  | 0.010784  |
| C | 4.419396  | 0.159705  | -0.048538 |
| N | -4.476828 | 0.006090  | 0.007114  |
| N | -2.698421 | -1.359440 | 0.110870  |
| N | 1.525623  | 2.486017  | 0.086500  |
| N | 1.578393  | -2.200728 | -0.027096 |
| H | -0.851380 | 1.460349  | -0.185990 |
| H | -4.658758 | -2.124897 | 0.190985  |
| H | -5.441888 | 0.294571  | -0.003779 |
| H | -0.543579 | -2.482261 | -0.027042 |
| H | 1.875507  | -3.162262 | -0.050316 |
| H | 4.412760  | -2.005425 | -0.081766 |
| H | 4.159299  | 2.294792  | 0.036747  |
| H | 5.502105  | 0.240075  | -0.075350 |

---

|                                 |           |           |           |
|---------------------------------|-----------|-----------|-----------|
| H                               | 0.677464  | 2.462072  | 0.633195  |
| H                               | 2.073074  | 3.308444  | 0.294833  |
| O                               | -3.457058 | 2.099991  | -0.166379 |
| <hr/>                           |           |           |           |
| Coordinates for Model Number 21 |           |           |           |
| C                               | -1.709938 | 0.781640  | -0.000170 |
| C                               | -4.192548 | 0.668746  | -0.000389 |
| C                               | -4.246741 | -1.576278 | -0.000369 |
| C                               | -2.841014 | 0.037478  | -0.000266 |
| C                               | -0.324662 | 0.364402  | -0.000041 |
| C                               | 0.667774  | 1.330106  | 0.000055  |
| C                               | 0.095330  | -1.004454 | -0.000005 |
| C                               | 2.028711  | 0.963833  | 0.000183  |
| C                               | 2.317290  | -0.432837 | 0.000207  |
| C                               | 3.077450  | 1.916856  | 0.000284  |
| C                               | 3.684141  | -0.842417 | 0.000338  |
| C                               | 4.381145  | 1.485942  | 0.000407  |
| C                               | 4.686511  | 0.108901  | 0.000435  |
| N                               | -5.031119 | -0.446152 | -0.000448 |
| N                               | -2.973174 | -1.354717 | -0.000263 |
| N                               | 1.348718  | -1.383857 | 0.000113  |
| H                               | -1.887651 | 1.857065  | -0.000192 |
| H                               | -4.691176 | -2.565559 | -0.000396 |
| H                               | -6.037664 | -0.401365 | -0.000538 |
| H                               | 0.403985  | 2.386014  | 0.000032  |
| H                               | -0.659550 | -1.785644 | -0.000078 |
| H                               | 2.836392  | 2.976096  | 0.000264  |
| H                               | 5.195247  | 2.204746  | 0.000485  |
| H                               | 5.727196  | -0.208774 | 0.000536  |
| H                               | 4.878492  | -2.319640 | 0.000450  |
| O                               | -4.538142 | 1.834084  | -0.000431 |
| O                               | 3.927013  | -2.169781 | 0.000364  |
| <hr/>                           |           |           |           |
| Coordinates for Model Number 22 |           |           |           |
| C                               | -1.893561 | -1.060417 | -0.000137 |
| C                               | -0.530182 | -0.809610 | -0.000113 |
| C                               | -0.048098 | 0.514483  | -0.000001 |
| C                               | 1.363734  | 0.849715  | 0.000025  |
| C                               | -0.975364 | 1.573941  | 0.000086  |
| C                               | -2.340453 | 1.333755  | 0.000061  |
| C                               | -2.779601 | 0.014080  | -0.000050 |
| C                               | 3.835722  | 0.565418  | -0.000015 |
| C                               | 3.732448  | -1.676104 | -0.000218 |
| C                               | 2.440134  | 0.029644  | -0.000053 |
| N                               | 4.594076  | -0.606236 | -0.000127 |
| N                               | 2.475869  | -1.367189 | -0.000180 |

---

|   |           |           |           |
|---|-----------|-----------|-----------|
| N | -4.218699 | -0.250316 | -0.000076 |
| H | -2.283213 | -2.072024 | -0.000223 |
| H | 0.179108  | -1.629436 | -0.000182 |
| H | -0.613284 | 2.598304  | 0.000174  |
| H | -3.062961 | 2.141453  | 0.000126  |
| H | 1.607538  | 1.911251  | 0.000117  |
| H | 4.105854  | -2.694443 | -0.000312 |
| H | 5.601452  | -0.634641 | -0.000139 |
| O | 4.257018  | 1.703183  | 0.000086  |
| O | -4.971051 | 0.712822  | -0.000019 |
| O | -4.579678 | -1.417712 | -0.000151 |

---



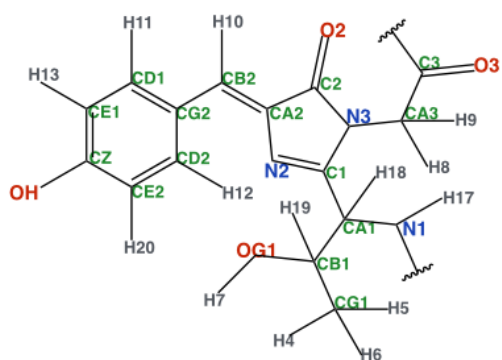

| Atom Name | Atom type | Charge    |
|-----------|-----------|-----------|
| N1        | n         | -0.373500 |
| H17       | hn        | 0.237600  |
| CA1       | c3        | -0.005700 |
| H18       | h1        | 0.169400  |
| CB1       | c3        | 0.104500  |
| H19       | h1        | 0.179200  |
| CG1       | c3        | -0.326300 |
| H4        | hc        | 0.089800  |
| H5        | hc        | 0.089800  |
| H6        | hc        | 0.089800  |
| OG1       | oh        | -0.605100 |
| H7        | ho        | 0.385500  |
| C1        | cc        | 0.012200  |
| N2        | nd        | -0.307100 |
| N3        | n         | 0.011000  |
| C2        | c         | 0.355800  |
| O2        | o         | -0.629500 |
| CA2       | cd        | -0.039300 |
| CA3       | c3        | -0.047000 |
| H8        | h1        | 0.046500  |
| H9        | h1        | 0.046500  |
| C3        | c         | 0.589400  |
| O3        | o         | -0.605400 |
| CB2       | ce        | -0.072700 |
| H10       | ha        | 0.129100  |
| CG2       | ca        | -0.077800 |
| CD1       | ca        | -0.103300 |
| H11       | ha        | 0.129900  |
| CD2       | ca        | -0.103300 |
| H12       | ha        | 0.129900  |
| CE1       | ca        | -0.369800 |
| H13       | ha        | 0.127800  |
| CE2       | ca        | -0.369800 |
| H20       | ha        | 0.127800  |
| CZ        | c         | 0.657000  |
| OH        | o         | -0.672900 |

**Table S2** Atom Types and charges for the *control* model mapped by the atom names. The lower-case letters refer to atom types as in the GAFF. The charges are computed by R.E.D. Server Development online tools as explained in the main text.

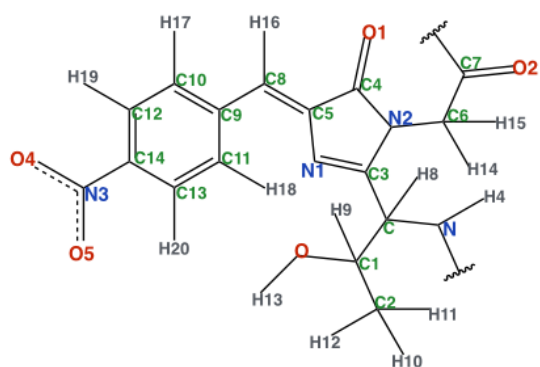

| Atom Name | Atom type | Charge    |
|-----------|-----------|-----------|
| C7        | c         | 0.567500  |
| O2        | o         | -0.541800 |
| C6        | c3        | -0.113900 |
| H14       | h1        | 0.090300  |
| H15       | h1        | 0.090300  |
| N2        | n         | 0.029900  |
| C4        | c         | 0.410300  |
| O1        | o         | -0.529000 |
| C3        | cc        | 0.226600  |
| C         | c3        | -0.047700 |
| N         | n         | -0.363100 |
| H4        | hn        | 0.312800  |
| C1        | c3        | 0.027100  |
| C2        | c3        | -0.054400 |
| H10       | hc        | 0.030700  |
| H11       | hc        | 0.030700  |
| H12       | hc        | 0.030700  |
| O         | oh        | -0.679800 |
| H13       | ho        | 0.473700  |
| H9        | h1        | 0.119200  |
| H8        | h1        | 0.167600  |
| N1        | nd        | -0.377400 |
| C5        | cd        | 0.102100  |
| C8        | ce        | -0.154600 |
| H16       | ha        | 0.139600  |
| C9        | ca        | 0.052700  |
| C11       | ca        | -0.083300 |
| H18       | ha        | 0.129900  |
| C13       | ca        | -0.191500 |
| H20       | ha        | 0.181200  |
| C14       | ca        | 0.032100  |
| N3        | no        | 0.773600  |
| O4        | o         | -0.459200 |
| O5        | o         | -0.459200 |
| C12       | ca        | -0.191500 |
| H19       | ha        | 0.181200  |
| C10       | ca        | -0.083300 |
| H17       | ha        | 0.129900  |

**Table S3** Atom Types and charges for the *nitro* model mapped by the atom names. The lower-case letters refer to atom types as in the GAFF. The charges are computed by R.E.D. Server Development online tools as explained in the main text.

Additional Parameters for the interface atoms between the chromophore model parameterized with GAFF and the rest of the protein parameterized with FF12SB. The parameters are given in the frmod format. Some are produced by ANTECHAMBER and the rest are assigned via comparison to parameters for similar atom types.

#### BOND

|     |       |       |
|-----|-------|-------|
| C-n | 490.0 | 1.335 |
| c-N | 490.0 | 1.335 |

#### ANGLE

|          |        |         |
|----------|--------|---------|
| ce-cd-c  | 63.460 | 120.890 |
| o -c -N  | 80.0   | 122.90  |
| O -C -n  | 80.0   | 122.90  |
| c -N -H  | 50.0   | 120.00  |
| C -n -hn | 50.0   | 120.00  |
| C -n -c3 | 63.92  | 121.35  |
| c3-c -N  | 67.86  | 115.15  |
| CX-C -n  | 70.0   | 116.60  |
| c -N -CX | 50.0   | 121.90  |

#### DIHE

|             |   |       |         |        |
|-------------|---|-------|---------|--------|
| ca-ca-ce-ha | 1 | 6.650 | 180.000 | 2.000  |
| ca-ca-ce-cd | 1 | 6.650 | 180.000 | 2.000  |
| ca-ce-cd-c  | 1 | 1.000 | 180.000 | 2.000  |
| ca-ce-cd-nd | 1 | 1.000 | 180.000 | 2.000  |
| ha-ce-cd-c  | 1 | 1.000 | 180.000 | 2.000  |
| ha-ce-cd-nd | 1 | 1.000 | 180.000 | 2.000  |
| O -C -n -hn | 1 | 2.50  | 180.000 | -2.000 |
| H -N -c -o  | 1 | 2.50  | 180.000 | -2.000 |
| H -N -c -o  | 1 | 2.00  | 0.000   | 1.000  |
| CX-C -n -hn | 1 | 2.5   | 180.000 | 2.000  |
| O -C -n -c3 | 1 | 2.5   | 180.000 | 2.000  |
| CX-C -n -hn | 1 | 2.5   | 180.000 | 2.000  |
| CX-C -n -c3 | 1 | 2.5   | 180.000 | 2.000  |
| c3-c -N -H  | 1 | 2.5   | 180.000 | 2.000  |
| c3-c -N -CX | 1 | 2.5   | 180.000 | 2.000  |
| o -c -N -CX | 1 | 2.5   | 180.000 | 2.000  |
| o -c -N -H  | 1 | 2.5   | 180.000 | 2.000  |

#### IMPROPER

|             |     |       |     |
|-------------|-----|-------|-----|
| ca-o -no-o  | 1.1 | 180.0 | 2.0 |
| ca-ca-ca-no | 1.1 | 180.0 | 2.0 |
| ca-ca-ca-ha | 1.1 | 180.0 | 2.0 |
| ca-ca-ca-ce | 1.1 | 180.0 | 2.0 |
| ca-cd-ce-ha | 1.1 | 180.0 | 2.0 |

---

|             |      |       |     |
|-------------|------|-------|-----|
| c -ce-cd-nd | 1.1  | 180.0 | 2.0 |
| cd-n -c -o  | 10.5 | 180.0 | 2.0 |
| c3-n -cc-nd | 1.1  | 180.0 | 2.0 |
| c3-n -c -o  | 10.5 | 180.0 | 2.0 |
| c -c3-n -cc | 1.1  | 180.0 | 2.0 |

Amber Input files used in the MD simulations. Minimization was done in two steps, heating in one step and density equilibration in 4 steps. Production was carried out in identical steps of 5 ns.

```

Minimization1
&cntrl
imin=1,
maxcyc=1000,
ncyc=100,
cut=10.0,
ntpr=100,
ntr=1,
restraintmask=':1-226',
restraint_wt=500,
/
Minimization2
&cntrl
imin=1,
maxcyc=1000,
ncyc=200,
cut=10.0,
ntpr=100,
/
Heating
&cntrl
imin=0,
irest=0,
ntx=1,
ntpr=1000,
ntwx=1000,
ntr=1,
restraint_wt=10.0,
restraintmask='?:1-226?',
nstlim=10000,dt=0.002,
ntc=2,ntf=2,
cut=8.0,
ntt=3,
gamma_ln=2.0,
temp0=300.0,
temp1=0.0,

```

---

```
ig=-1,  
/  
density1  
&cntrl  
imin=0,  
irest=1,  
ntx=7,  
nstlim=25000,dt=0.002,  
ntc=2,ntf=2,  
cut=8.0,  
ntp=1,  
pres0=1.0,  
taup=2.0,  
ntpr=1000,  
ntwx=1000,  
ntt=3,  
gamma_ln=2.0,  
ioutfm=1,  
temp0=300.0,  
tempi=300.0,  
ig=-1,  
ntr=1,  
restraintmask=':1-226',  
restraint_wt=5.0,  
/  
density2  
&cntrl  
imin=0,  
irest=1,  
ntx=7,  
nstlim=25000,dt=0.002,  
ntc=2,ntf=2,  
cut=8.0,  
ntp=1,  
pres0=1.0,  
taup=2.0,  
ntpr=1000,  
ntwx=1000,  
ntt=3,  
gamma_ln=2.0,  
ioutfm=1,  
temp0=300.0,  
tempi=300.0,  
ig=-1,
```

---

```
ntr=1,
restraintmask=':1-226',
restraint_wt=2.0,
/
density3
&cntrl
imin=0,
irest=1,
ntx=7,
nstlim=25000,dt=0.002,
ntc=2,ntf=2,
cut=8.0,
ntp=1,
pres0=1.0,
taup=2.0,
ntpr=1000,
ntwx=1000,
ntt=3,
gamma_ln=2.0,
ioutfm=1,
temp0=300.0,
tempi=300.0,
ig=-1,
ntr=1,
restraintmask=':1-226',
restraint_wt=0.5,
/
density4
&cntrl
imin=0,
irest=1,
ntx=7,
nstlim=25000,dt=0.002,
ntc=2,ntf=2,
cut=8.0,
ntp=1,
pres0=1.0,
taup=2.0,
ntpr=1000,
ntwx=1000,
ntt=3,
gamma_ln=2.0,
ioutfm=1,
temp0=300.0,
```

---

```
tempi=300.0,  
ig=-1,  
ntr=1,  
restraintmask=':1-226',  
restraint_wt=0.1,  
/  
Production  
&cntrl  
imin=0,  
irest=1,  
ntx=7,  
nstlim=2500000,dt=0.002,  
ntc=2,ntf=2,  
cut=8.0,  
ntp=1,  
pres0=1.0,  
taup=2.0,  
ntpr=1000,  
ntwx=1000,  
ioutfm=1,  
ntt=3,  
gamma_ln=2.0,  
temp0=300.0,  
tempi=300.0,  
ig=-1,  
ntr=0,  
/  

```

---

| Model | $\delta^{TPA}$ (a.u.) |
|-------|-----------------------|
| 1a    | 42                    |
| 1b    | 13                    |
| 2a    | 15                    |
| 2b    | 20                    |
| 3     | 24                    |
| 4     | 11                    |
| 5     | 180                   |
| 6     | 342                   |
| 7     | 339                   |
| 8     | 370                   |
| 9     | 609                   |
| 10    | 763                   |
| 11    | 1049                  |
| 12    | 1358                  |
| 13    | 1751                  |
| 14    | 1744                  |
| 15    | 1879                  |
| 16a   | 2046                  |
| 16b   | 1882                  |
| 17    | 2067                  |
| 18    | 2540                  |
| 19    | 2908                  |
| 20    | 5738                  |
| 21    | 5258                  |
| 22    | 8834                  |

**Table S4** The  $\delta^{TPA}$  values for the chromophore models as computed at the TDDFT/6-31+(d,p) Level of Theory in PCM (water)



| Bond               | Dynamics Average (DA) | Crystal Structure (CS) | DFT-optimized Structure (DF) | DA-CS | DA-DF | DF-CS |
|--------------------|-----------------------|------------------------|------------------------------|-------|-------|-------|
| C1-N3              | 1.39                  | 1.35                   | 1.38                         | 0.04  | 0.01  | 0.03  |
| C2-CA2             | 1.46                  | 1.46                   | 1.46                         | 0.00  | 0.01  | 0.00  |
| C2-O2              | 1.22                  | 1.30                   | 1.24                         | 0.08  | 0.02  | 0.06  |
| CA2-CB2            | 1.37                  | 1.47                   | 1.39                         | 0.10  | 0.01  | 0.08  |
| CA2-N2             | 1.38                  | 1.37                   | 1.40                         | 0.01  | 0.01  | 0.03  |
| CB2-CG2            | 1.49                  | 1.47                   | 1.41                         | 0.02  | 0.08  | 0.06  |
| CD1-CE1            | 1.39                  | 1.40                   | 1.37                         | 0.01  | 0.02  | 0.03  |
| CD2-CG2            | 1.40                  | 1.40                   | 1.43                         | 0.00  | 0.03  | 0.03  |
| CE1-CZ             | 1.48                  | 1.39                   | 1.45                         | 0.09  | 0.03  | 0.06  |
| CE2-CD2            | 1.39                  | 1.43                   | 1.37                         | 0.04  | 0.03  | 0.06  |
| CG2-CD1            | 1.40                  | 1.43                   | 1.43                         | 0.03  | 0.03  | 0.00  |
| CZ-CE2             | 1.48                  | 1.39                   | 1.46                         | 0.09  | 0.03  | 0.07  |
| CZ-OH              | 1.21                  | 1.39                   | 1.25                         | 0.18  | 0.04  | 0.14  |
| N2-C1              | 1.34                  | 1.38                   | 1.30                         | 0.04  | 0.05  | 0.08  |
| N3-C2              | 1.34                  | 1.34                   | 1.40                         | 0.00  | 0.07  | 0.06  |
| maximum difference |                       |                        |                              | 0.18  | 0.08  | 0.14  |

**Table S5** Comparison of average bond lengths (in Å) of the *control* chromophore over the dynamics trajectory (Dynamic Average) to the corresponding bond lengths of the chromophore in the crystal structure (PDB ID: 2Y0G) and to those of the same chromophore as optimized at the PBE0/6-31+(d,p) level of theory in the gas phase (DFT-optimized Structure). Bond lengths differences are given in absolute values. Atom names match the figure in Table S2

| Bond               | Dynamics Average (DA) | DFT-optimized Structure (DF) | DA-DF |
|--------------------|-----------------------|------------------------------|-------|
| C5-N1              | 1.38                  | 1.40                         | 0.02  |
| C5-C8              | 1.38                  | 1.35                         | 0.02  |
| N1-C3              | 1.34                  | 1.29                         | 0.05  |
| C3-N2              | 1.39                  | 1.37                         | 0.02  |
| N2-C4              | 1.34                  | 1.40                         | 0.06  |
| C4-C5              | 1.47                  | 1.49                         | 0.03  |
| C4-O1              | 1.22                  | 1.21                         | 0.01  |
| C8-C9              | 1.49                  | 1.45                         | 0.03  |
| C9-C10             | 1.39                  | 1.41                         | 0.01  |
| C10-C12            | 1.40                  | 1.39                         | 0.01  |
| C12-C14            | 1.40                  | 1.39                         | 0.01  |
| C14-C13            | 1.40                  | 1.39                         | 0.01  |
| C14-N3             | 1.50                  | 1.46                         | 0.03  |
| C13-C11            | 1.40                  | 1.39                         | 0.01  |
| C11-C9             | 1.40                  | 1.41                         | 0.01  |
| N3-O4              | 1.22                  | 1.22                         | 0.00  |
| N3-O5              | 1.22                  | 1.22                         | 0.00  |
| maximum difference |                       |                              | 0.06  |

**Table S6** Comparison of average bond lengths (in Å) of the *nitro* chromophore over the dynamics trajectory (Dynamic Average) to the corresponding bond lengths of the same chromophore (Model 22) as optimized at the PBE0/6-31+(d,p) level of theory in the gas phase (DFT-optimized Structure). Bond lengths differences are given in absolute values. Atom names match the figure in Table S3

| Model | PCM        |      |          | Gas-phase  |      |          |
|-------|------------|------|----------|------------|------|----------|
|       | Energy(eV) | OS   | TPA (GM) | Energy(eV) | OS   | TPA (GM) |
| 6     | 3.197      | 0.91 | 1        | 3.336      | 0.81 | 0        |
| 7     | 3.200      | 0.93 | 1        | 3.331      | 0.81 | 0        |
| 12    | 3.210      | 0.98 | 5        | 3.351      | 0.86 | 5        |
| 13    | 3.289      | 0.85 | 7        | 3.444      | 0.74 | 7        |
| 14    | 3.310      | 0.89 | 7        | 3.451      | 0.79 | 7        |
| 16a   | 3.218      | 0.58 | 8        | 3.348      | 0.42 | 8        |
| 18    | 3.137      | 0.93 | 9        | 3.352      | 0.79 | 10       |
| 19    | 3.138      | 0.55 | 11       | 3.250      | 0.33 | 11       |
| 20    | 2.689      | 0.36 | 15       | 2.826      | 0.28 | 17       |
| 22    | 2.965      | 0.64 | 29       | 3.257      | 0.61 | 22       |

**Table S7** Comparison of PCM and Gas phase computations at the TDDFT/6-31+(d,p) Level of Theory for selected chromophore models.

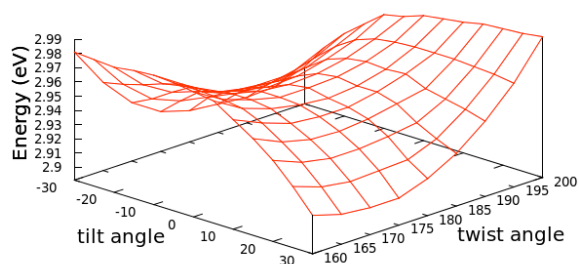

**Fig. S1** Variation of Energy for various conformers of the nitro chromophore with the tilt and twist angles while fixing the methine bridge at 134°.

|   |    |         |    |          |    |       |
|---|----|---------|----|----------|----|-------|
| C |    |         |    |          |    |       |
| N | 1  | 1.39729 |    |          |    |       |
| C | 2  | 1.29399 | 1  | 105.277  |    |       |
| N | 3  | 1.37369 | 2  | 115.035  | 1  | 0     |
| C | 4  | 1.39566 | 3  | 108.2405 | 2  | 0     |
| H | 4  | 1.00778 | 3  | 127.2314 | 5  | 180   |
| O | 5  | 1.21326 | 4  | 126.7683 | 3  | 180   |
| H | 3  | 1.08464 | 2  | 123.9485 | 4  | 180   |
| C | 1  | 1.3532  | 2  | 128.768  | 5  | 180   |
| H | 9  | 1.08917 | 1  | 114.3677 | 2  | 180   |
| C | 9  | 1.45109 | 1  | meth     | 2  | tilt  |
| C | 11 | 1.40793 | 9  | 117.8361 | 1  | twist |
| C | 12 | 1.38606 | 11 | 121.2143 | 9  | 180   |
| C | 13 | 1.39083 | 12 | 118.3849 | 11 | 0     |
| C | 14 | 1.3927  | 13 | 122.0847 | 12 | 0     |
| C | 15 | 1.38626 | 14 | 119.0858 | 13 | 0     |
| H | 15 | 1.08406 | 14 | 119.4249 | 13 | 180   |
| H | 16 | 1.08407 | 15 | 120.4418 | 14 | 180   |
| H | 12 | 1.08647 | 13 | 119.4459 | 14 | 180   |
| H | 13 | 1.08369 | 14 | 119.7805 | 15 | 180   |
| N | 14 | 1.46318 | 13 | 118.8164 | 12 | 180   |
| O | 21 | 1.22216 | 14 | 117.5846 | 13 | 0     |
| O | 21 | 1.22193 | 14 | 117.593  | 13 | 180   |

**Table S8** The z-matrix used in the conformational analysis of the nitro-chromophore. The entries: meth, tilt and twist refer to the methyl bridge, tilting and twisting angles referred to in the main text.

**Table S9** Energy, OS, TPA (in GM) and the square of the x-component of the difference between permanent moments of excited and ground states (in atomic units) of various conformers of the nitro chromophore computed at the TDDFT/6-31+(d,p) Level of Theory in the gas phase (while fixing the methine bridge at 134°).

| Tilt | Twist | Energy(eV) | OS    | TPA   | $(\Delta\mu_x)^2$ |
|------|-------|------------|-------|-------|-------------------|
| -30  | 160   | 2.981      | 0.509 | 26.62 | 6.452             |
| -30  | 165   | 2.953      | 0.534 | 26.25 | 6.239             |
| -30  | 170   | 2.932      | 0.556 | 25.78 | 6.011             |
| -30  | 175   | 2.919      | 0.575 | 25.21 | 5.798             |
| -30  | 180   | 2.913      | 0.593 | 24.55 | 5.613             |
| -30  | 185   | 2.911      | 0.608 | 24.12 | 5.465             |
| -30  | 190   | 2.909      | 0.620 | 24.16 | 5.358             |
| -30  | 195   | 2.910      | 0.627 | 24.32 | 5.295             |
| -30  | 200   | 2.917      | 0.630 | 24.56 | 5.273             |
| -25  | 160   | 2.980      | 0.523 | 28.63 | 7.195             |
| -25  | 165   | 2.956      | 0.548 | 28.12 | 6.890             |
| -25  | 170   | 2.939      | 0.569 | 27.55 | 6.606             |
| -25  | 175   | 2.931      | 0.589 | 26.82 | 6.355             |
| -25  | 180   | 2.927      | 0.606 | 26.21 | 6.149             |

---

|     |     |       |       |       |       |
|-----|-----|-------|-------|-------|-------|
| -25 | 185 | 2.923 | 0.619 | 26.07 | 5.994 |
| -25 | 190 | 2.922 | 0.628 | 26.15 | 5.894 |
| -25 | 195 | 2.926 | 0.633 | 26.34 | 5.844 |
| -25 | 200 | 2.935 | 0.634 | 26.57 | 5.851 |
|     |     |       |       |       |       |
| -20 | 160 | 2.979 | 0.539 | 30.11 | 7.796 |
| -20 | 165 | 2.960 | 0.562 | 29.53 | 7.423 |
| -20 | 170 | 2.948 | 0.583 | 28.78 | 7.095 |
| -20 | 175 | 2.942 | 0.602 | 28.07 | 6.825 |
| -20 | 180 | 2.935 | 0.617 | 27.78 | 6.615 |
| -20 | 185 | 2.933 | 0.627 | 27.74 | 6.471 |
| -20 | 190 | 2.933 | 0.633 | 27.86 | 6.394 |
| -20 | 195 | 2.939 | 0.636 | 28.01 | 6.386 |
| -20 | 200 | 2.949 | 0.635 | 28.32 | 6.444 |
|     |     |       |       |       |       |
| -15 | 160 | 2.981 | 0.555 | 31.12 | 8.255 |
| -15 | 165 | 2.965 | 0.577 | 30.36 | 7.840 |
| -15 | 170 | 2.956 | 0.598 | 29.65 | 7.496 |
| -15 | 175 | 2.946 | 0.614 | 29.25 | 7.228 |
| -15 | 180 | 2.942 | 0.626 | 29.06 | 7.037 |
| -15 | 185 | 2.940 | 0.633 | 29.07 | 6.916 |
| -15 | 190 | 2.943 | 0.637 | 29.17 | 6.888 |
| -15 | 195 | 2.951 | 0.637 | 29.40 | 6.947 |
| -15 | 200 | 2.960 | 0.632 | 29.79 | 7.100 |
|     |     |       |       |       |       |
| -10 | 160 | 2.982 | 0.572 | 31.65 | 8.578 |
| -10 | 165 | 2.969 | 0.593 | 30.96 | 8.149 |
| -10 | 170 | 2.957 | 0.610 | 30.46 | 7.809 |
| -10 | 175 | 2.951 | 0.623 | 30.16 | 7.564 |
| -10 | 180 | 2.947 | 0.632 | 30.02 | 7.414 |
| -10 | 185 | 2.948 | 0.637 | 30.00 | 7.364 |
| -10 | 190 | 2.953 | 0.638 | 30.09 | 7.418 |
| -10 | 195 | 2.960 | 0.634 | 30.40 | 7.604 |
| -10 | 200 | 2.971 | 0.626 | 30.73 | 7.921 |
|     |     |       |       |       |       |
| -5  | 160 | 2.981 | 0.587 | 32.02 | 8.790 |
| -5  | 165 | 2.968 | 0.606 | 31.35 | 8.378 |
| -5  | 170 | 2.960 | 0.622 | 30.84 | 8.067 |
| -5  | 175 | 2.955 | 0.632 | 30.55 | 7.870 |
| -5  | 180 | 2.953 | 0.638 | 30.44 | 7.791 |
| -5  | 185 | 2.954 | 0.639 | 30.48 | 7.842 |
| -5  | 190 | 2.958 | 0.635 | 30.75 | 8.019 |
| -5  | 195 | 2.965 | 0.627 | 31.15 | 8.339 |
| -5  | 200 | 2.974 | 0.614 | 31.64 | 8.731 |

---

|    |     |       |       |       |       |
|----|-----|-------|-------|-------|-------|
| 0  | 160 | 2.979 | 0.602 | 31.92 | 8.914 |
| 0  | 165 | 2.967 | 0.619 | 31.31 | 8.516 |
| 0  | 170 | 2.960 | 0.630 | 30.95 | 8.253 |
| 0  | 175 | 2.955 | 0.636 | 30.78 | 8.095 |
| 0  | 180 | 2.955 | 0.639 | 30.65 | 8.038 |
| 0  | 185 | 2.956 | 0.637 | 30.72 | 8.095 |
| 0  | 190 | 2.960 | 0.629 | 31.03 | 8.253 |
| 0  | 195 | 2.967 | 0.617 | 31.44 | 8.516 |
| 0  | 200 | 2.979 | 0.602 | 31.88 | 8.914 |
|    |     |       |       |       |       |
| 5  | 160 | 2.977 | 0.616 | 31.42 | 8.731 |
| 5  | 165 | 2.965 | 0.628 | 31.01 | 8.339 |
| 5  | 170 | 2.958 | 0.635 | 30.69 | 8.019 |
| 5  | 175 | 2.954 | 0.639 | 30.52 | 7.842 |
| 5  | 180 | 2.952 | 0.637 | 30.52 | 7.791 |
| 5  | 185 | 2.954 | 0.631 | 30.65 | 7.870 |
| 5  | 190 | 2.959 | 0.620 | 30.94 | 8.067 |
| 5  | 195 | 2.968 | 0.606 | 31.32 | 8.378 |
| 5  | 200 | 2.981 | 0.588 | 31.84 | 8.790 |
|    |     |       |       |       |       |
| 10 | 160 | 2.968 | 0.624 | 30.99 | 7.921 |
| 10 | 165 | 2.959 | 0.633 | 30.51 | 7.604 |
| 10 | 170 | 2.952 | 0.638 | 30.15 | 7.418 |
| 10 | 175 | 2.950 | 0.638 | 29.93 | 7.364 |
| 10 | 180 | 2.950 | 0.634 | 29.81 | 7.414 |
| 10 | 185 | 2.954 | 0.625 | 29.94 | 7.564 |
| 10 | 190 | 2.960 | 0.611 | 30.34 | 7.809 |
| 10 | 195 | 2.968 | 0.594 | 30.87 | 8.149 |
| 10 | 200 | 2.983 | 0.574 | 31.39 | 8.578 |
|    |     |       |       |       |       |
| 15 | 160 | 2.959 | 0.631 | 29.93 | 7.100 |
| 15 | 165 | 2.950 | 0.637 | 29.44 | 6.947 |
| 15 | 170 | 2.945 | 0.638 | 29.09 | 6.888 |
| 15 | 175 | 2.944 | 0.635 | 28.85 | 6.916 |
| 15 | 180 | 2.946 | 0.627 | 28.85 | 7.037 |
| 15 | 185 | 2.950 | 0.614 | 29.11 | 7.228 |
| 15 | 190 | 2.954 | 0.600 | 29.58 | 7.496 |
| 15 | 195 | 2.968 | 0.582 | 30.01 | 7.840 |
| 15 | 200 | 2.986 | 0.560 | 30.59 | 8.255 |
|    |     |       |       |       |       |
| 20 | 160 | 2.948 | 0.635 | 28.42 | 6.444 |
| 20 | 165 | 2.940 | 0.637 | 27.97 | 6.386 |
| 20 | 170 | 2.936 | 0.635 | 27.65 | 6.394 |

---

|    |     |       |       |       |       |
|----|-----|-------|-------|-------|-------|
| 20 | 175 | 2.936 | 0.628 | 27.56 | 6.471 |
| 20 | 180 | 2.938 | 0.617 | 27.65 | 6.615 |
| 20 | 185 | 2.941 | 0.604 | 28.02 | 6.825 |
| 20 | 190 | 2.951 | 0.588 | 28.36 | 7.095 |
| 20 | 195 | 2.967 | 0.568 | 28.87 | 7.423 |
| 20 | 200 | 2.987 | 0.544 | 29.58 | 7.796 |
|    |     |       |       |       |       |
| 25 | 160 | 2.934 | 0.635 | 26.58 | 5.851 |
| 25 | 165 | 2.927 | 0.634 | 26.20 | 5.844 |
| 25 | 170 | 2.924 | 0.628 | 26.01 | 5.894 |
| 25 | 175 | 2.925 | 0.619 | 25.96 | 5.994 |
| 25 | 180 | 2.926 | 0.608 | 26.20 | 6.149 |
| 25 | 185 | 2.934 | 0.593 | 26.46 | 6.355 |
| 25 | 190 | 2.948 | 0.575 | 26.90 | 6.606 |
| 25 | 195 | 2.966 | 0.554 | 27.47 | 6.890 |
| 25 | 200 | 2.988 | 0.528 | 28.08 | 7.195 |
|    |     |       |       |       |       |
| 30 | 160 | 2.918 | 0.631 | 24.44 | 5.273 |
| 30 | 165 | 2.912 | 0.627 | 24.15 | 5.295 |
| 30 | 170 | 2.910 | 0.619 | 24.01 | 5.358 |
| 30 | 175 | 2.910 | 0.610 | 24.15 | 5.465 |
| 30 | 180 | 2.917 | 0.597 | 24.28 | 5.613 |
| 30 | 185 | 2.928 | 0.581 | 24.55 | 5.798 |
| 30 | 190 | 2.944 | 0.562 | 24.99 | 6.011 |
| 30 | 195 | 2.964 | 0.539 | 25.46 | 6.239 |
| 30 | 200 | 2.990 | 0.513 | 25.98 | 6.452 |

---
